# Supplementary material
Source: PubMed Central journal article supplement (PMC2991396)
Supplement: NIHMS234998-supplement-Online_Methods.pdf [file NIHMS234998-supplement-Online_Methods.pdf]

## Material and methods

**Mice, antigens and immunisation.** All mice were bred and maintained at the animal facilities of The Water and Eliza Hall Institute of Medical Research (Parkville, Australia) and were backcrossed to the C57BL/6 background for more than 10 generations. All procedures involving animal were approved by our institutional animal ethics committee. Mice with conditional (1) and null (2) alleles of *Bcl2l1* (*Bcl-x<sub>L</sub>*) were kindly provided by Dr. L. Hennighausen (NIH, Bethesda, USA) and Dr. D.Y. Loh (Washington University School of Medicine, St. Louis, USA), respectively. *Mcl-1<sup>fl/fl</sup>*, *Aicda*-Cre and *Rosa26*-CreER<sup>T2</sup> (TaconicArtemis) mice have been described (3-5). Bone marrow reconstituted mice were generated using the following protocols. (A) Transfer of Ly5.1 wildtype and Ly5.2 *Mcl-1<sup>fl/+</sup>* *Aicda*-Cre bone marrow into lethally irradiated (2 x 5.5 Gy, 3 hrs apart) Ly5.1 recipients at a ratio of 1:1. (B) Transfer of Ly5.2 *Bcl2l1<sup>+/+</sup>* *Aicda*-Cre or *Bcl2l1<sup>fl/-</sup>* *Aicda*-cre bone marrow cells into lethally irradiated Ly5.1 recipients. (C) Irradiated Ly5.1 mice were reconstituted with 80% B cell deficient ( $\mu$ MT) (6) plus 20% *Mcl1<sup>+/+</sup>* Cre-ER, *Mcl1<sup>fl/+</sup>* Cre-ER, or *Mcl1<sup>fl/fl</sup>* Cre-ER bone marrow. Immunisation comprised a single intraperitoneal injection of 100 $\mu$ g NP coupled to keyhole limpet hemocyanin (NP-KLH) at a ratio of 21:1 and precipitated onto alum, prepared as described previously (7). Estrogen receptor (ER) mediated deletion of LoxP *Mcl1* alleles was accomplished by oral gavage with Tamoxifen on day 7 and 8 after immunization as described (8). Spleens were isolated at day 9 after immunization.

**Antibodies, flow cytometry, cell sorting and V<sub>H</sub> gene sequencing.** Single cell suspensions were stained as described(9) using antibodies to the following surface molecules: CD38 (NIMR-5), B220 (RA3-6B2), IgM (331.12), IgD (11-26C), Gr-1 (RB6-8C5), CD138 (281.2), IgG<sub>1</sub> (X56; BD Pharmingen), Fc $\gamma$ R (2.4G2), PNA (FL-1071), CD19 (1D3; BD Pharmingen), CD45.2 (BD

Pharmingen), hCD2 (Lym-1) and hCD4 (OKT4). NP binding was detected as described (9). Stained, cells were analysed on an LSRII (BD Biosciences). B cells (CD19<sup>+</sup>PNA<sup>-</sup>), GC B cells (CD19<sup>+</sup>PNA<sup>+</sup>) or (NP<sup>+</sup>IgG1<sup>+</sup>CD38<sup>-</sup>) and memory B cells (NP<sup>+</sup>IgG1<sup>+</sup>CD38<sup>+</sup>) were sorted from splenocytes with a FACSARIA (BD Biosciences) to more than 98% purity. Single NP<sup>+</sup>IgG1<sup>+</sup> cells and NP<sup>+</sup>IgG1<sup>+</sup>CD38<sup>+</sup> cells were sorted and processed for cDNA synthesis and V<sub>H</sub> gene PCR amplification as described (9). Sequencing was done with ABI BigDye mix 3.1 with automated base calling.

**Enzyme-linked immunospot (ELISPOT) assay and enzyme-linked immunosorbent assay (ELISA).** The frequency of ASCs was determined as described (9). Cells were incubated O/N at 37°C on pre-coated 96-well MultiScreen-HA filter plates (Millipore). Spots were visualized with anti-IgM or anti-IgG<sub>1</sub>-specific goat anti-mouse antibodies conjugated to horseradish peroxidase (Southern Biotechnology Associates; SBA) and colour was developed by addition of 3-amino-9-ethyl carbazole (Sigma-Aldrich). Plates were washed extensively and spots were counted with an AID ELISpot reader system (Autoimmune Diagnostika). Anti-NP ELISAs were performed as described (9).

**Western blotting.** Total cell lysates from sorted follicular (CD19<sup>+</sup>PNA<sup>-</sup>) or GC (CD19<sup>+</sup>PNA<sup>+</sup>) B cells were prepared, separated and blotted as described (10). Blots were blocked with 5% skim milk and 0.1% Tween20 in PBS and incubated overnight at 4°C with the following antibodies: rat anti-Mcl1 (clone 19C4-15), rat anti-Bcl2l1 (Bcl-x<sub>L</sub>; clone 9C9 or polyclonal rabbit, BD Pharmingen), hamster anti-Bcl2 (clone 3F11), anti-Bim (rat monoclonal 3C5, ENZO Biosciences or polyclonal rabbit serum, Stressgen), anti-Bcl6 (7D1-10, rat IgG2a monoclonal raised against

aa. 261 – 386 of mouse BCL6 fused with GST) and anti- $\beta$ -actin (AC40, Sigma). Bound primary antibodies were visualised by incubation with horseradish peroxidase conjugated to species-specific anti-IgG secondary antibody. Blots were developed with SuperSignal ECL reagent (Pierce). Band densities were measured by Optical densitometry using a GS-800 Calibrated Densitometer (Bio-Rad) with QuantityOne 4.6.1 software (Bio-Rad) and the intensity in GC B cells relative to follicular B cells is given for each protein.

**Immunohistochemistry.** Tissue samples were embedded, stored, sectioned and stained as described (11). Antibodies used were unlabeled GL7 and biotinylated anti-B220. GL7 was detected with Alexa555-conjugated goat anti-rat antibodies (Invitrogen) and biotinylated anti-B220 with streptavidin-Cy5 (SBA). Antibodies used for detecting IgM foci were unlabeled goat anti-IgM (SBA) and unlabeled rabbit anti-CD3 (SP7, supernatant), detected with Alexa488-conjugated donkey anti-goat antibodies (Invitrogen) and Alexa647-conjugated goat anti-rabbit antibodies (Invitrogen) in subsequent steps.

**Statistical analysis.** Statistical analysis was performed using GraphPad Prism software (GraphPad Software, San Diego, California, USA). A Student's *t*-test with two-tailed distributions for two samples with equal variance was used. Data are shown as mean  $\pm$  SEM where applicable, with a  $P < 0.05$  considered significant and exact *P* values presented in the figures.

### Online Methods References

1. K. U. Wagner *et al.*, *Development* 127, 4949 (2000).
2. N. Motoyama *et al.*, *Science* 267, 1506 (1995).
3. S. N. Willis *et al.*, *Science* 315, 856 (2007).
4. K. Kwon *et al.*, *Immunity* 28, 751 (2008).
5. J. Seibler *et al.*, *Nucleic Acids Res* 31, e12 (2003).
6. D. Kitamura, J. Roes, R. Kuhn, K. Rajewsky, *Nature* 350, 423 (1991).
7. K. G. Smith, A. Light, G. J. Nossal, D. M. Tarlinton, *Embo J* 16, 2996 (1997).
8. S. Glaser *et al.*, *Epigenetics Chromatin* 2, 5 (2009).
9. K. G. Smith *et al.*, *J Exp Med* 191, 475 (2000).
10. Y. Xu, S. J. Beavitt, K. W. Harder, M. L. Hibbs, D. M. Tarlinton, *J Immunol* 169, 6910 (2002).
11. A. Ridderstad, D. M. Tarlinton, *J Immunol* 160, 4688 (1998).
