# Supplementary material
Source: PubMed Central journal article supplement (PMC2991396)
Supplement: NIHMS234998-supplement-Supplementary_Figures.pdf [file NIHMS234998-supplement-Supplementary_Figures.pdf]

Supplementary figure 1

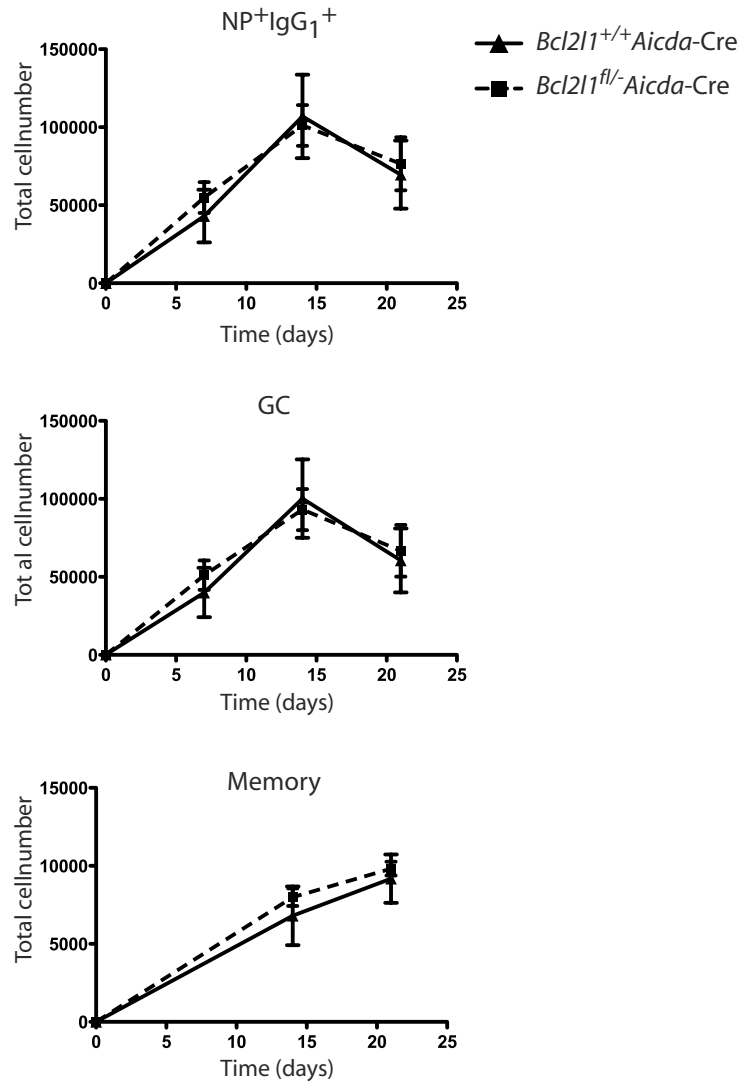

**Fig. S1.** Kinetics of the GC response in *Bcl2l1* deficient mice.

Flow cytometric analysis of splenocytes on days 7, 14 and 21 after intraperitoneal immunization with NP-KLH in alum. Isotype switched (IgM<sup>-</sup>IgD<sup>-</sup>Gr-1<sup>-</sup>CD138<sup>-</sup>B220<sup>+</sup>) B cells were analysed for NP<sup>+</sup>IgG<sub>1</sub><sup>+</sup> status and then sub-divided into GC (CD38<sup>-</sup>) and memory (CD38<sup>+</sup>) B cells. Numbers of each of the respective populations (total, GC and memory) are plotted. Data are the mean ± SEM of between three and six mice in each group and summarize two experiments for each time point. One experiment used mice reconstituted with *Bcl2l1*<sup>fl/-</sup>*Aicda-Cre* or *Bcl2l1*<sup>+/+</sup>*Aicda-Cre* bone marrow.

Supplementary figure 2

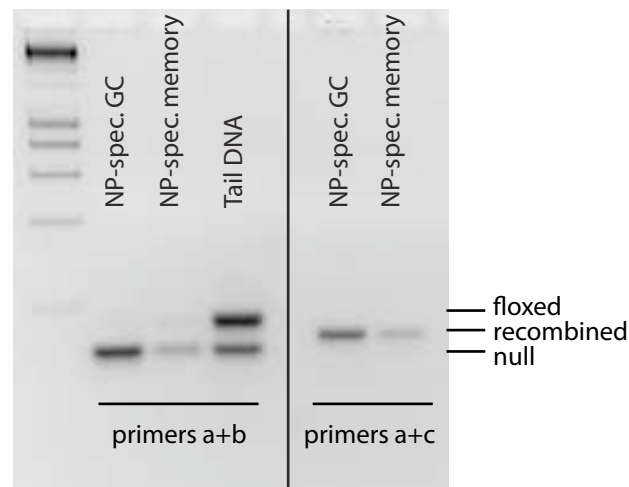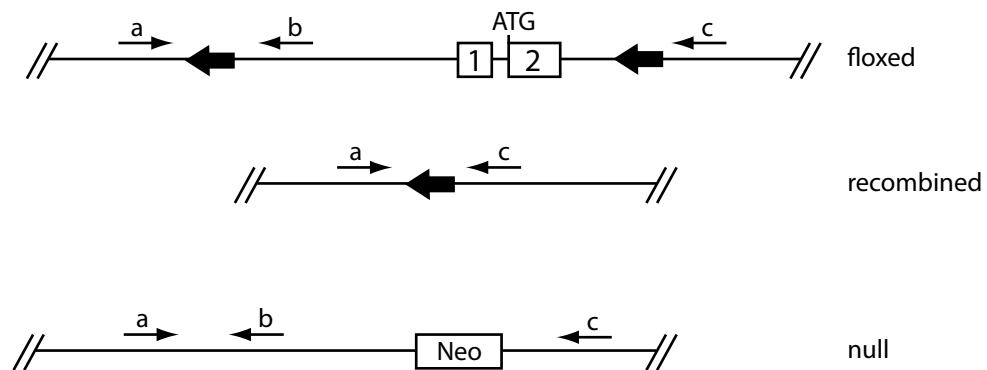

**Fig. S2.** The *Bcl2l1* floxed allele is efficiently deleted in *Bcl2l1<sup>fl/-</sup>-Aicda-Cre* GC and memory B cells. PCR detecting the floxed and deleted *Bcl2l1* alleles in DNA from sorted GC (NP<sup>+</sup>IgG<sub>1</sub><sup>+</sup>CD38<sup>-</sup>) and memory (NP<sup>+</sup>IgG<sub>1</sub><sup>+</sup>CD38<sup>+</sup>) B cells from two *Bcl2l1<sup>fl/-</sup>-Aicda-Cre* immunized mice, as well as in tail DNA from a *Bcl2l1<sup>fl/-</sup>-Aicda-Cre* mouse. Empty lanes from a single gel were removed from the image, rejoining indicated by the solid line. The data are representative of two independent experiments. Lower panel is a schematic representation of the *Bcl2l1* alleles used in these experiments. The floxed allele, before and after Cre-mediated deletion, and the null allele are shown. The positions where PCR primers bind are also indicated.

Supplementary figure 3

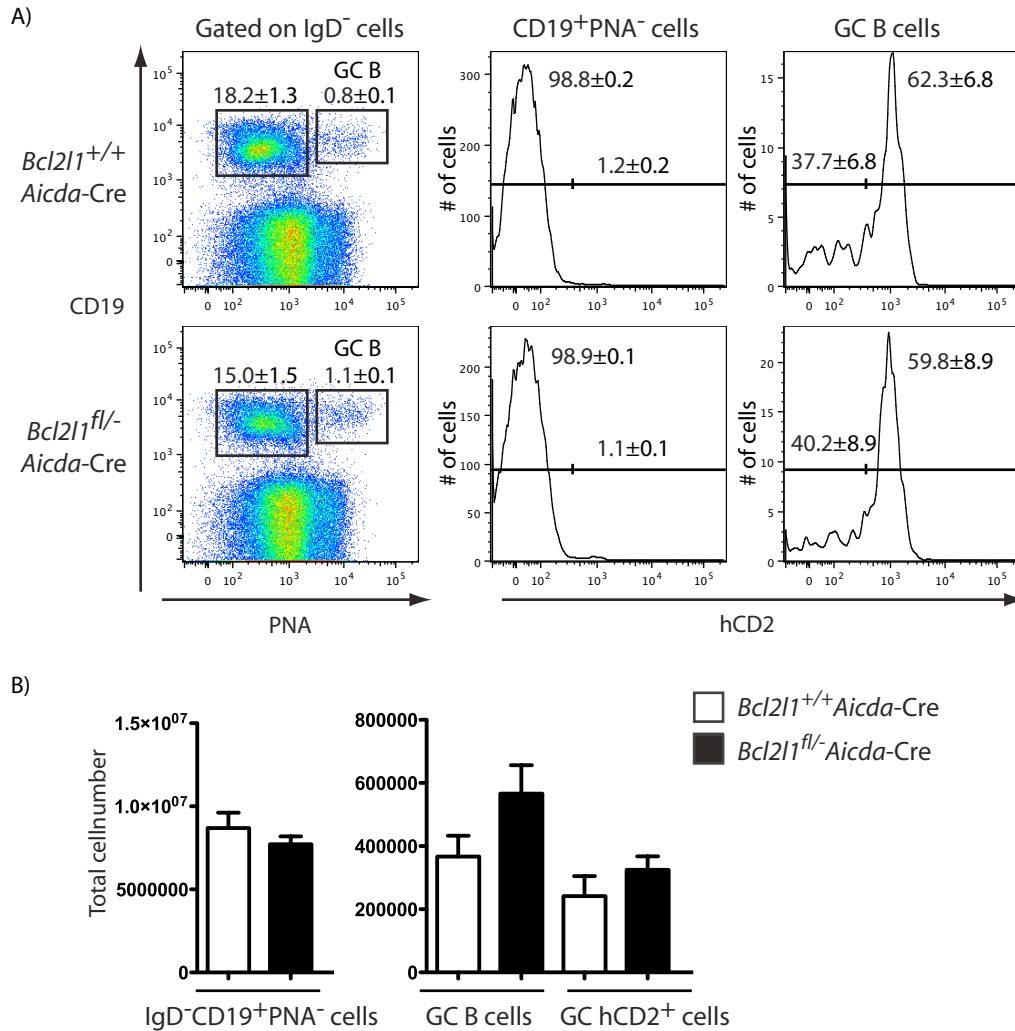

**Fig. S3.** Expression of *Aicda* and Cre recombinase in GC B cells but not follicular B cells in *Bcl2l1*<sup>fl/-</sup> *Aicda*-Cre mice.

(A) Flow cytometric analysis of splenocytes 21 days after intraperitoneal immunization with NP-KLH in alum. Non-GC (IgD<sup>-</sup>CD19<sup>+</sup>PNA<sup>-</sup>) and GC (IgD<sup>-</sup>CD19<sup>+</sup>PNA<sup>+</sup>) B cells were analysed for levels of hCD2t indicating expression of *Aicda* and Cre recombinase. Numbers in dot plots and histograms are mean percentage ± SEM. (B) Total cell numbers of the populations identified in (A) are plotted as the mean ± SEM of between four and six mice in each group, summarizing two experiments.

Supplementary figure 4

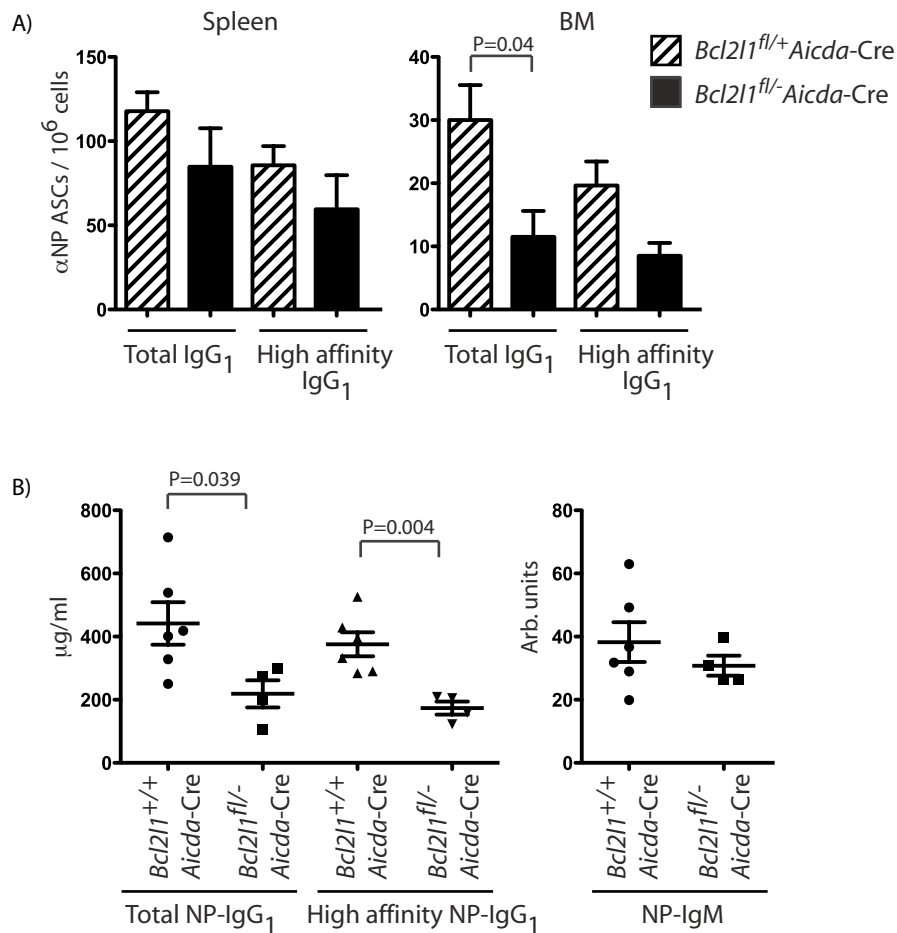

**Fig. S4.** *Bcl2l1* contributes to the survival of emigrating plasma cells and antibody titres.

(A) Frequencies of total and high affinity NP-specific IgG<sub>1</sub>-secreting antibody secreting cells in spleen and bone marrow 14 days after intraperitoneal immunization of *Bcl2l1* conditionally targeted mice with NP-KLH in alum. Data are the mean  $\pm$  SEM of replicate wells with four to six mice in each group and summarize two experiments. (B) ELISA of total (NP13) and high affinity (NP2) anti-NP-IgG<sub>1</sub> and total anti-NP-IgM in serum, measured on day 21 after immunization. Values from individual mice are shown, as are the means  $\pm$  SEM. Significant differences in (A) and (B), determined by Student's T-test, are shown.

Supplementary figure 5

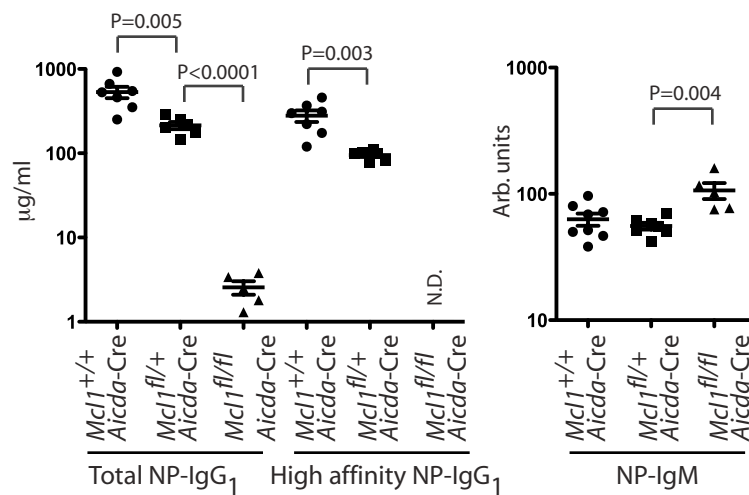

**Fig. S5.** Conditional deletion of *Mcl1* abrogates the formation of NP-specific plasma cells. ELISA of total (NP13) and high affinity (NP2) anti-NP-IgG<sub>1</sub> and total anti-NP-IgM in serum, measured on day 14 after intraperitoneal immunization with NP-KLH in alum. Data are the mean  $\pm$  SEM of between five and eight mice in each group and summarize three experiments. Values from individual mice are shown, as are the means  $\pm$  SEM. Significant differences, determined by Student's T-test, are shown.

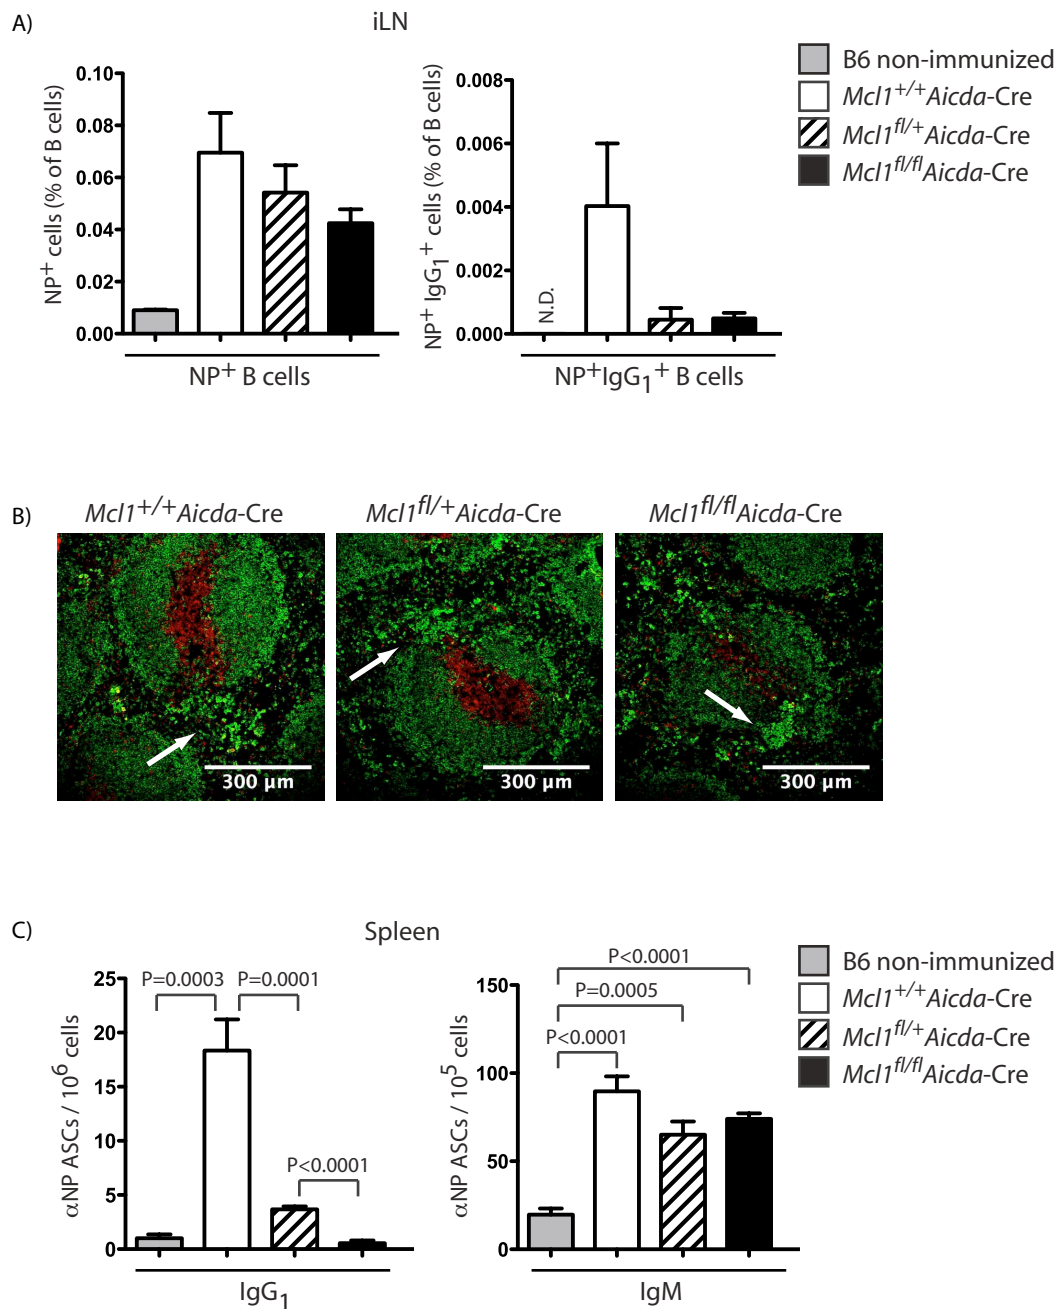

**Fig. S6.** Loss of *Mcl1* blocks appearance of NP<sup>+</sup>IgG<sub>1</sub><sup>+</sup> B cells on day 5 of the immune response.

(A) Frequency of NP-binding (left) and NP<sup>+</sup>IgG<sub>1</sub><sup>+</sup> (right) B cells in inguinal lymph nodes (iLN) 5 days after subcutaneous immunization of mice with NP-KLH in alum. Status of the *Mcl1* locus and *Aicda-Cre* are indicated. All immunized mice show an expansion of NP-reactive B cells, but loss of *Mcl1* coincident with expression of AID prevents appearance of NP<sup>+</sup>IgG<sub>1</sub><sup>+</sup> cells. B6 are non-immunized C57BL/6 controls. (B) Frozen sections of spleens from the indicated strains 5 days after immunization, stained with anti-IgM (green) and anti-CD3 (red). Foci of IgM ASC developed in the bridging channels in all strains, indicated by arrows. Original magnification x 20 with scale indicated. (C) ELISPOT analysis of NP-reactive ASC in spleens 5 days after immunization showing equal development of IgM ASC (right) but deficiency of IgG<sub>1</sub> ASC in strains capable of deleting *Mcl1*. Significant differences, calculated using Student's T-test, are indicated. Data are from 3 mice per group.

Supplementary figure 7

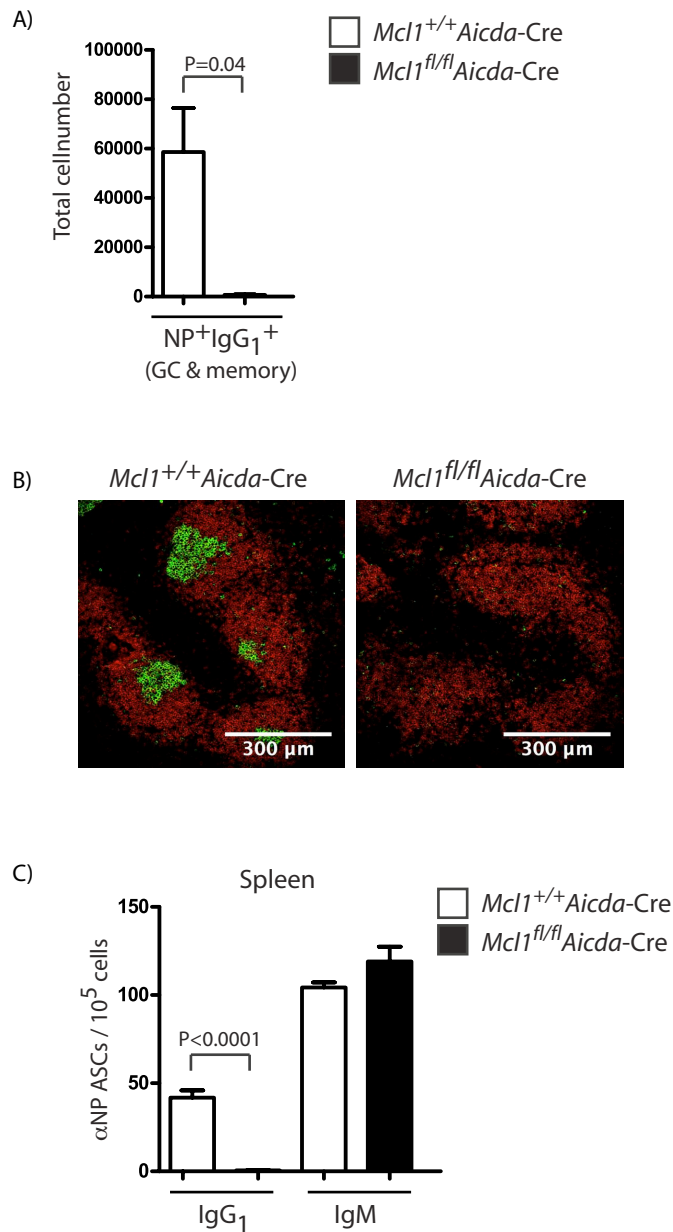

**Fig. S7.** Loss of *Mcl1* blocks appearance of NP<sup>+</sup>IgG<sub>1</sub><sup>+</sup> B cells on day 7 of the immune response  
**(A)** Absolute number of NP<sup>+</sup>IgG<sub>1</sub><sup>+</sup> B cells in the spleens of mice immunized by intraperitoneal injection of NP-KLH in alum 7 days previously. Status of the *Mcl1* locus and *Aicda*-Cre are indicated. Significant differences, calculated using Student's T-test, are indicated. **(B)** Frozen sections of spleens from the indicated strains 7 days after immunization, stained with anti-B220 (red) and anti-GL7 (green). GC are not apparent in *Mcl1*<sup>fl/fl</sup>*Aicda*-Cre mice. Original magnification x 20 with scale indicated. **(C)** ELISPOT analysis of NP-reactive ASC in spleens 7 days after immunization showing equal development of IgM ASC but deficiency of IgG<sub>1</sub> ASC in mice capable of deleting *Mcl1*. Significant differences, calculated using Student's T-test, are indicated. Data are from 4 mice per group.

Supplementary figure 8

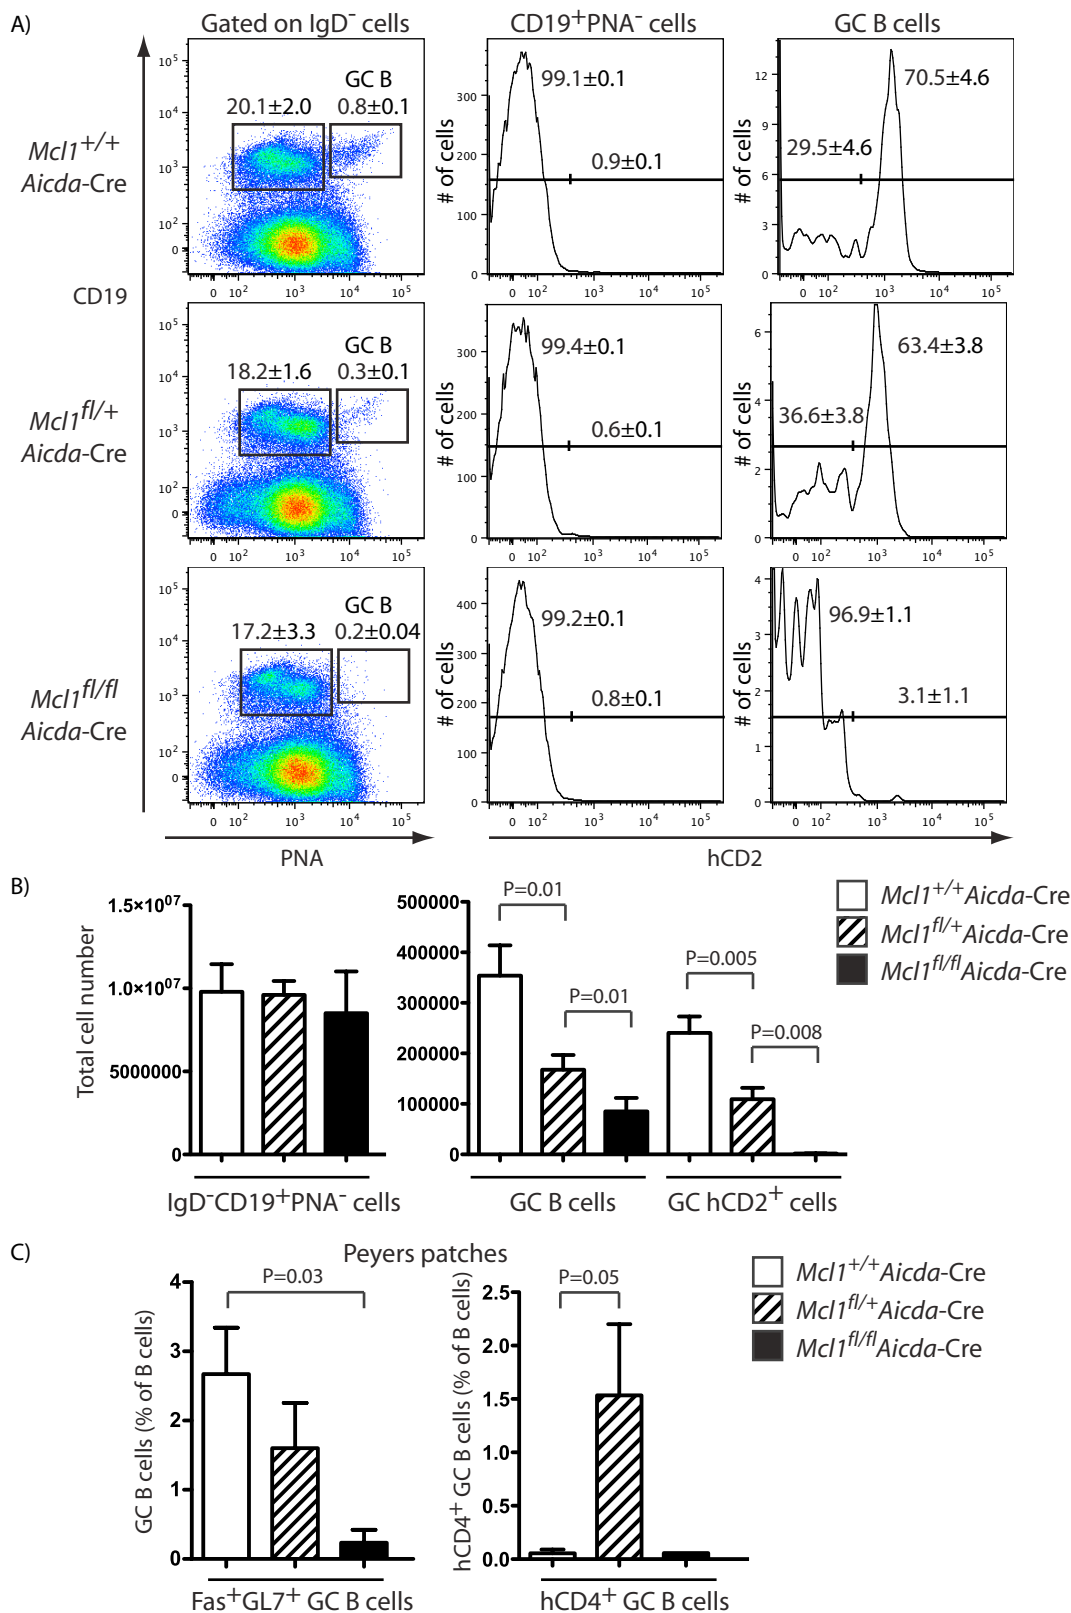

**Fig. S8.** Deletion of GC B cells expressing *Aicda* and Cre recombinase in *Mcl1*<sup>fl/fl</sup>*Aicda*-Cre mice.

(A) Flow cytometric analysis of splenocytes 14 days after intraperitoneal immunization with NP-KLH in alum. Non-GC (IgD<sup>-</sup>CD19<sup>+</sup>PNA<sup>-</sup>) and GC (IgD<sup>-</sup>CD19<sup>+</sup>PNA<sup>+</sup>) B cells were analysed for *hCD2t* expression, indicating co-expression of *Aicda* and Cre recombinase. Numbers in plots and histograms are the mean percentages ± SEM. (B) Total cell numbers of the populations identified in (A) are graphed as the mean ± SEM of between four and eight mice in each group, summarizing three experiments. (C) Peyer's patches, collected from the indicated groups of mice, were analysed for the representation of GC B cells (CD19<sup>+</sup>FAS<sup>+</sup>GL7<sup>+</sup>) amongst all B cells (left) and of hCD4<sup>+</sup> GC B cells (right). Significant differences, calculated using Student's T-test, are indicated. Data are from 3-4 mice per group.



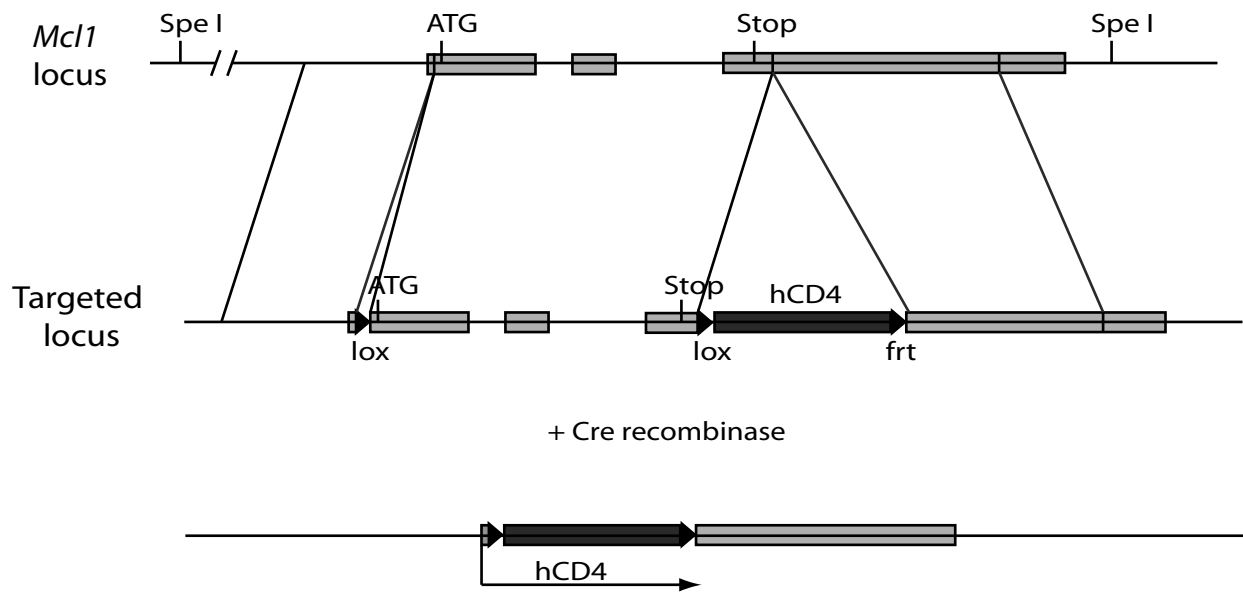

**Fig. S9.** *Mcl1* gene-targeting construct

The construct designed to introduce LoxP sites flanking the *Mcl1* locus contains *hCD4* such that upon *Mcl1* deletion, it is subjugated to the promoter of *Mcl1*. *hCD4* is subsequently expressed on the cell surface serving as a reporter for both deletion of the *Mcl1* allele and *Mcl1* transcription.

Supplementary figure 10

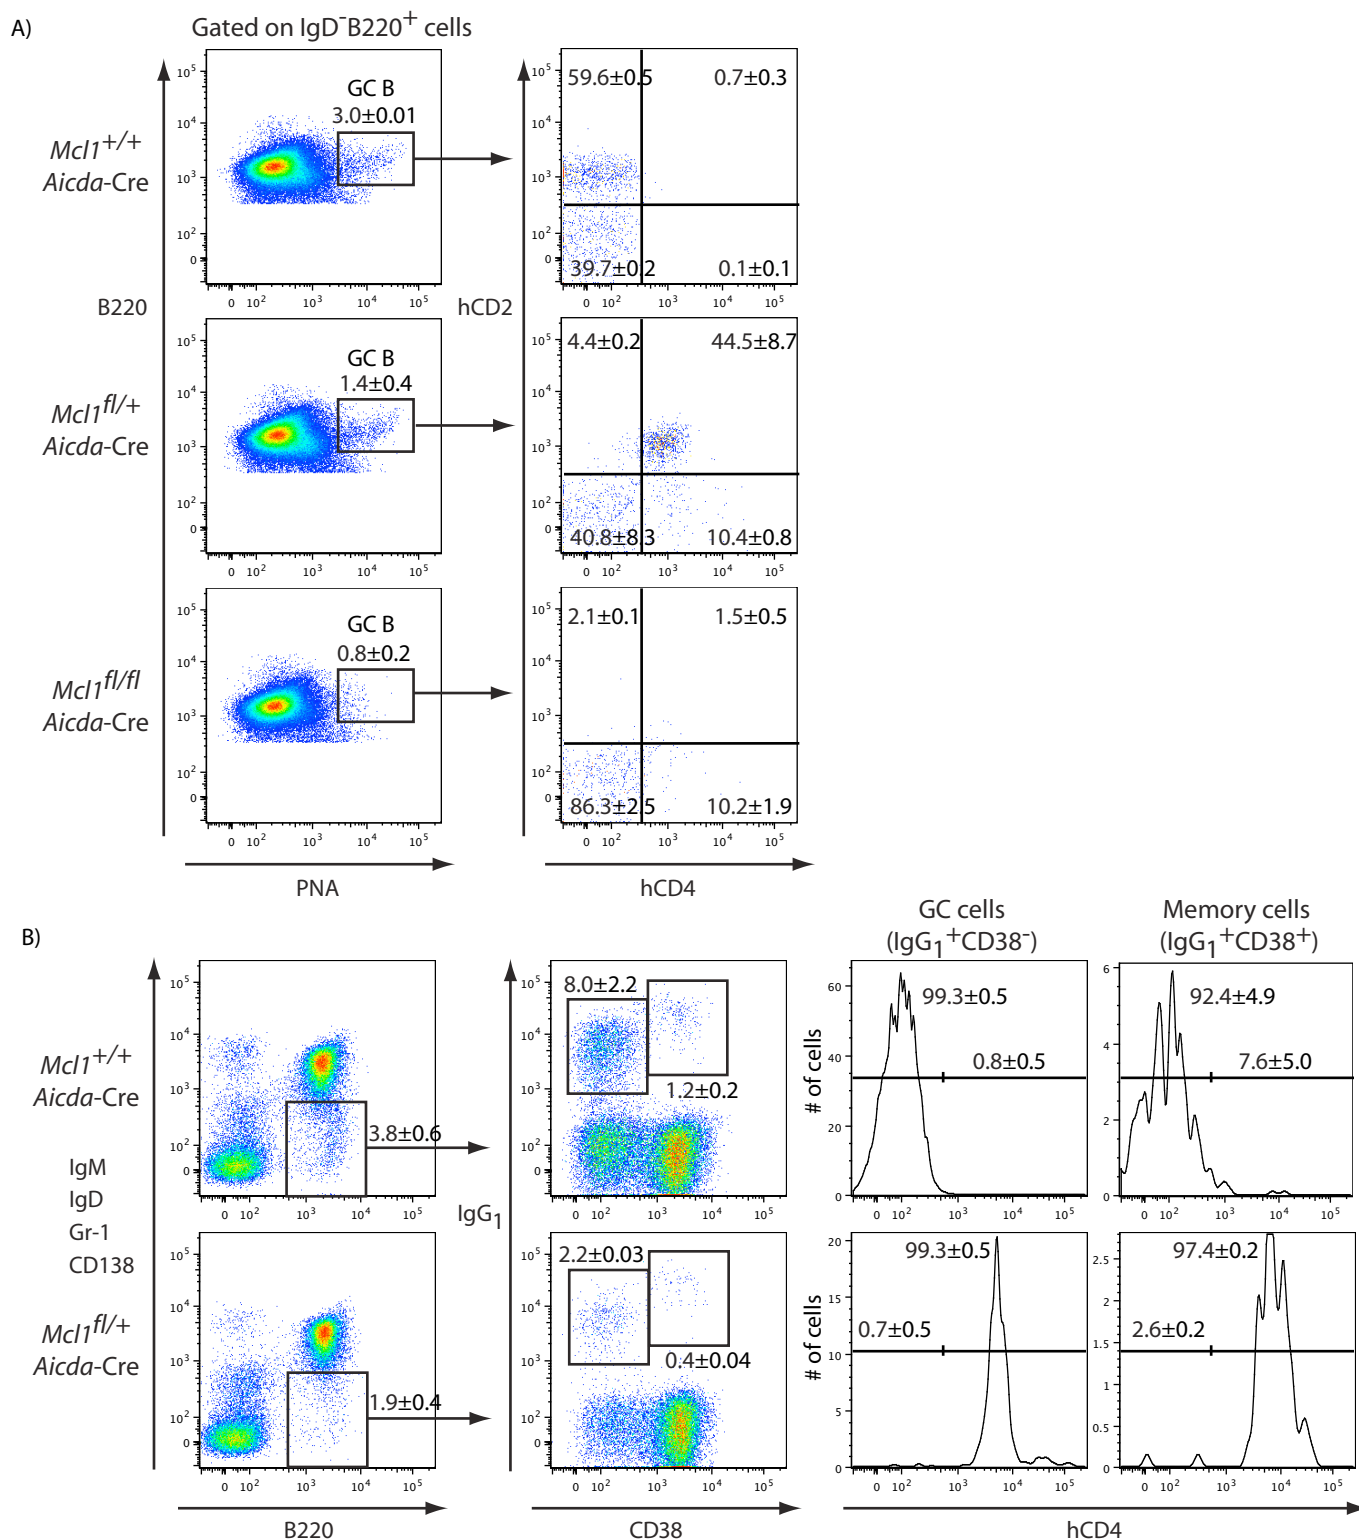

**Fig. S10.** *Mcl1* is efficiently deleted in GC and memory B cells as reported by *hCD4* expression.

(A) Flow cytometric analysis of splenocytes 14 days after intraperitoneal immunization with NP-KLH in alum. GC (IgD<sup>-</sup>B220<sup>+</sup>PNA<sup>+</sup>) B cells were analysed for *hCD2t*, reporting co-expression of *Aicda* and Cre recombinase as well as amounts of *hCD4*, reporting *Mcl1* deletion. Numbers in plots are the mean percentages ± SEM. Data are the means ± SEM of two or three mice in each group. (B) IgG1<sup>+</sup> GC B cells (CD38<sup>-</sup>) and memory B cells (CD38<sup>+</sup>) in *Mcl1*<sup>fl/+</sup> *Aicda-Cre* mice were assessed for *hCD4* expression. Numbers in dotplots and histograms are mean percentages ± SEM of at least two mice in each group.

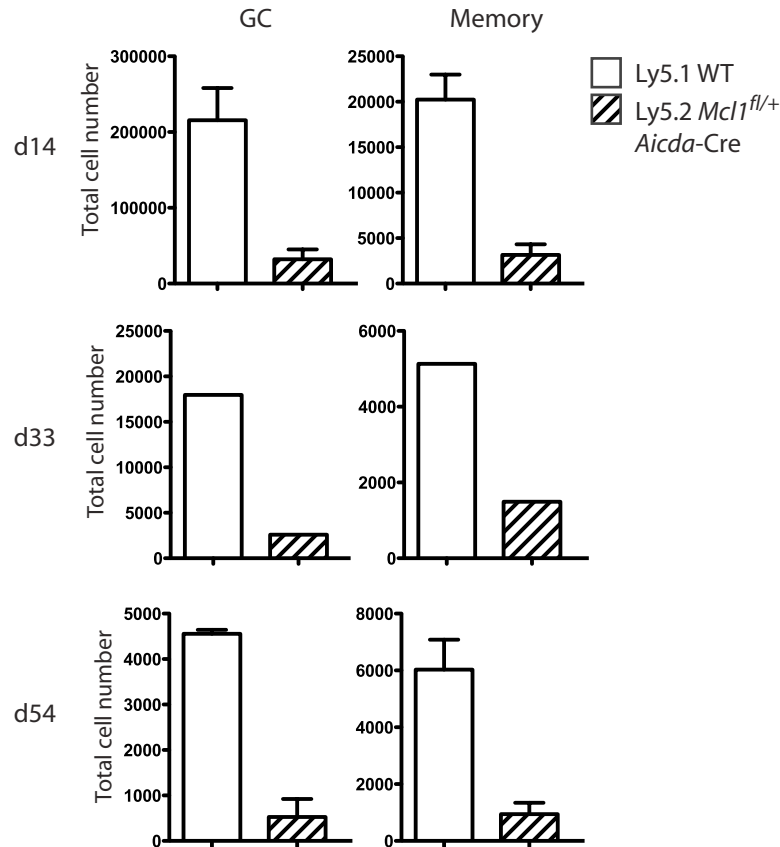

**Fig. S11.** Comparable fold reduction of *Mcl1<sup>fl/+</sup>* B cells amongst the GC and memory compartments that remain constant over time.

Absolute numbers of NP<sup>+</sup>IgG<sub>1</sub><sup>+</sup> GC (CD38<sup>-</sup>) and memory B cells (CD38<sup>+</sup>) arising from each genotype in *Mcl1<sup>fl/+</sup>**Aicda-Cre*/Ly5.1 chimeras at 14, 33 and 54 days after intraperitoneal immunization with NP-KLH in alum are graphed as the mean ± SEM of between 2 and 3 mice for each time point.

Supplementary figure 12

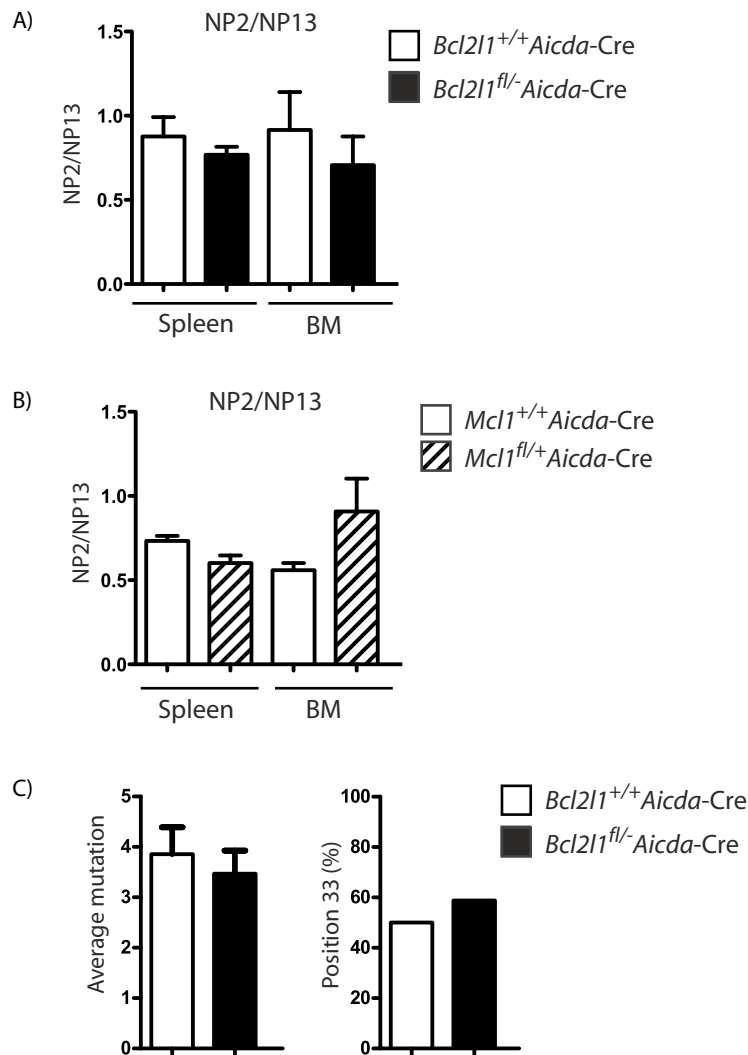

**Fig. S12.** Affinity maturation amongst NP-reactive B cells is unaffected by loss of either *Bcl2l1* or *Mcl1*. (A) Affinity maturation of NP-specific IgG<sub>1</sub> ASCs calculated as a ratio of NP2/NP13 for mice of the indicated genotypes on day 21 post immunization. Data are the mean  $\pm$  SEM from 4 – 6 mice per group with tissues and configuration of the *Bcl2l1* and *Aicda*-Cre alleles indicated. (B) Affinity maturation of NP-specific IgG<sub>1</sub> ASCs calculated as a ratio of NP2/NP13 for mice of the indicated genotypes on day 21 post immunization. Data are the mean  $\pm$  SEM from 5 - 10 mice per group with tissues and configuration of the *Mcl1* and *Aicda*-Cre alleles indicated. (C) Analysis of somatic hypermutation amongst NP<sup>+</sup>IgG<sub>1</sub><sup>+</sup>CD38<sup>hi</sup> memory B cells from mice of the indicated *Bcl2l1* genotypes assessed by comparing point mutations in the V<sub>H</sub>186.2 genes of single antigen specific B cells sorted 21 days after immunization with those in controls. Average mutation indicates the average number of point mutations per V<sub>H</sub>186.2 gene segment determined by comparing the region encoding amino acids 10 to 96 with the germline sequence from 17 *Bcl2l1* deleted cells with 14 controls. Position 33 (%) measures the frequency of the Trp to Leu exchange within CDR1 of V<sub>H</sub>186.2 that alone confers a 10-fold increase in affinity of binding NP.

Supplementary figure 13

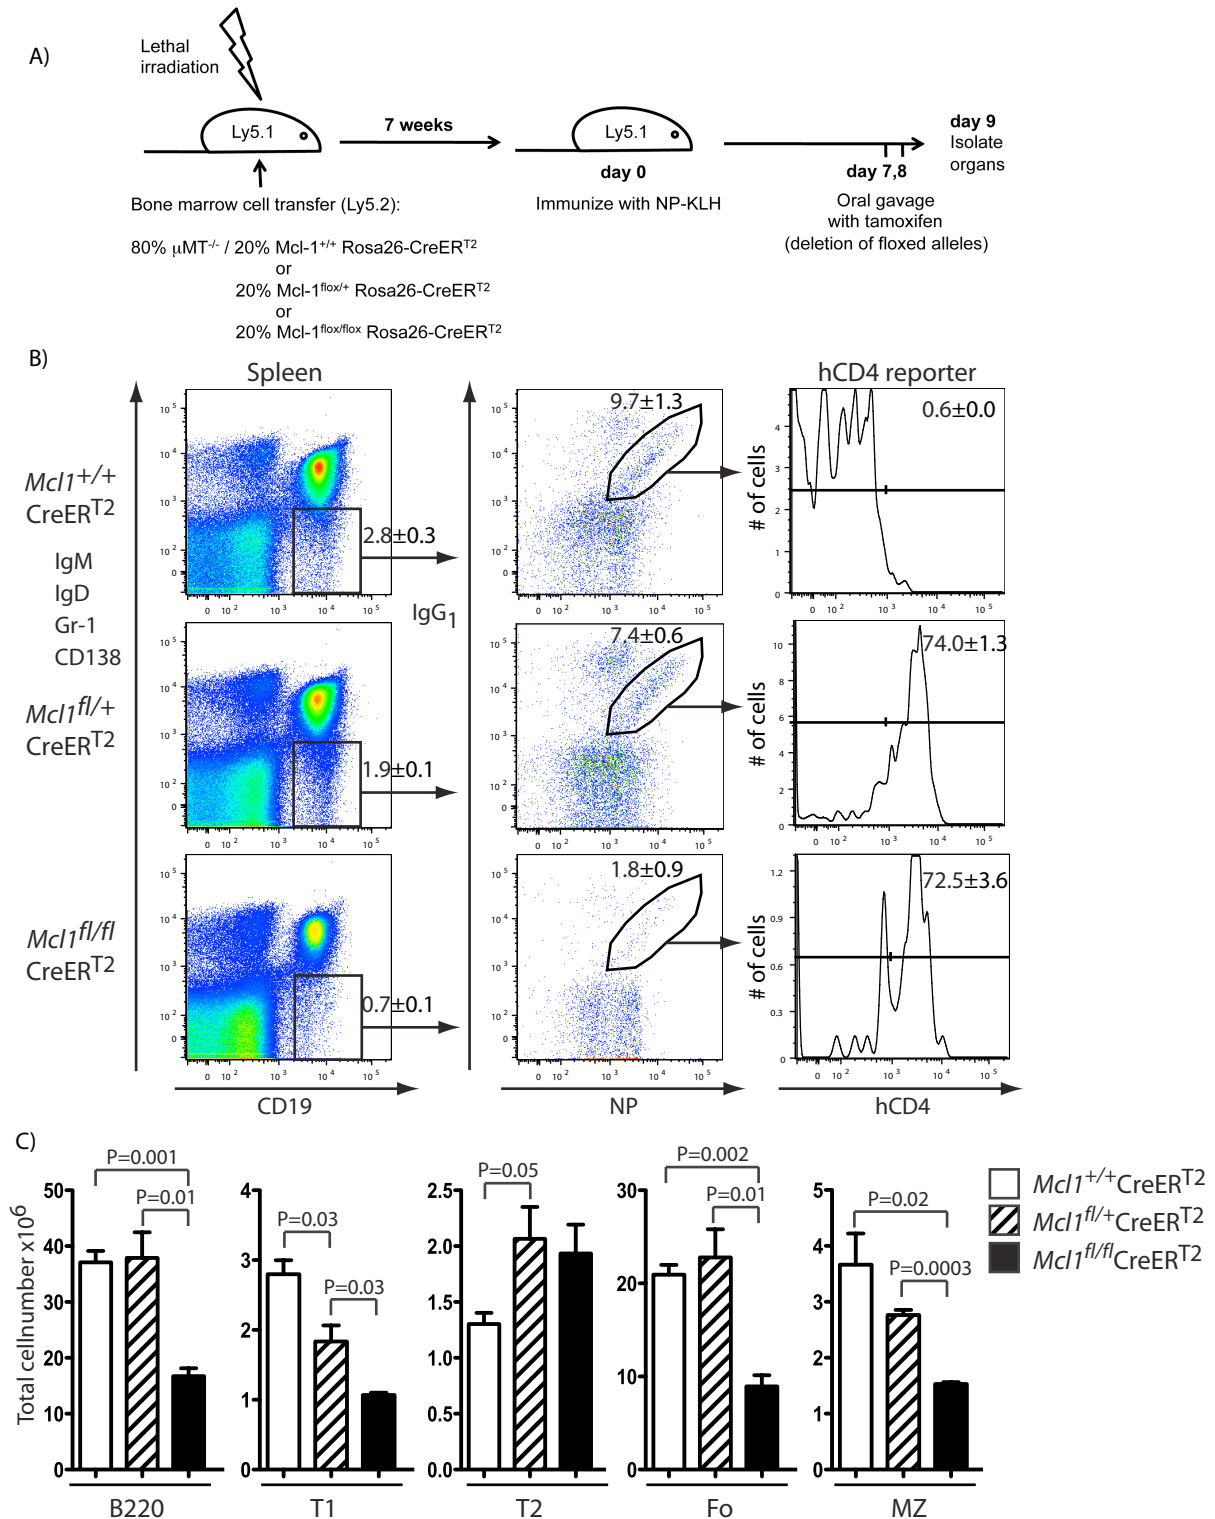

**Fig. S13.** Induced deletion of *Mcl1* leads to loss of NP<sup>+</sup>IgG<sub>1</sub><sup>+</sup> B cells during an immune response. **(A)** Irradiated C57BL/6-Ly5.1 mice were reconstituted with 80% B cell deficient ( $\mu$ MT) bone marrow plus 20% bone marrow from *Mcl1*<sup>+/+</sup>CreERT<sup>2</sup>, *Mcl1*<sup>fl/+</sup>CreERT<sup>2</sup>, or *Mcl1*<sup>fl/fl</sup>CreERT<sup>2</sup>. In the resultant chimeras, all B cells contained CreERT<sup>2</sup>, expressed from the *Rosa26* locus, and were either resistant (*Mcl1*<sup>+/+</sup>) or sensitive to *Mcl1* deletion on one (*Mcl1*<sup>fl/+</sup>) or both (*Mcl1*<sup>fl/fl</sup>) alleles. **(B)** Flow cytometric analysis of antigen-specific B cells persisting after induced deletion of *Mcl1*. Seven days after intraperitoneal immunization with NP-KLH in alum, mice were treated on two successive days with Tamoxifen to induce Cre activity and their spleens analysed for the frequency of isotype switched (IgM<sup>+</sup>IgD<sup>-</sup>Gr-1<sup>-</sup>CD138<sup>-</sup>B220<sup>+</sup>) B cells that were NP<sup>+</sup>IgG<sub>1</sub><sup>+</sup>. The amount of hCD4<sup>-</sup> indicative of *Mcl1* deletion<sup>-</sup> expressed on the remaining NP<sup>+</sup>IgG<sub>1</sub><sup>+</sup> cells was determined. **(C)** Total numbers of splenic B220<sup>+</sup> cells, CD23<sup>-</sup>IgM<sup>+</sup>CD21<sup>int</sup> transitional 1 (T1) cells, CD23<sup>+</sup>IgM<sup>hi</sup>CD21<sup>hi</sup> transitional 2 (T2) cells, CD23<sup>+</sup>IgM<sup>int</sup>CD21<sup>int</sup> follicular (Fo) cells and CD23<sup>-</sup>IgM<sup>+</sup>CD21<sup>hi</sup> marginal zone (MZ) cells in naive mice. Significant differences, calculated using Student's T-test, are indicated. Data are from 3 mice per group.

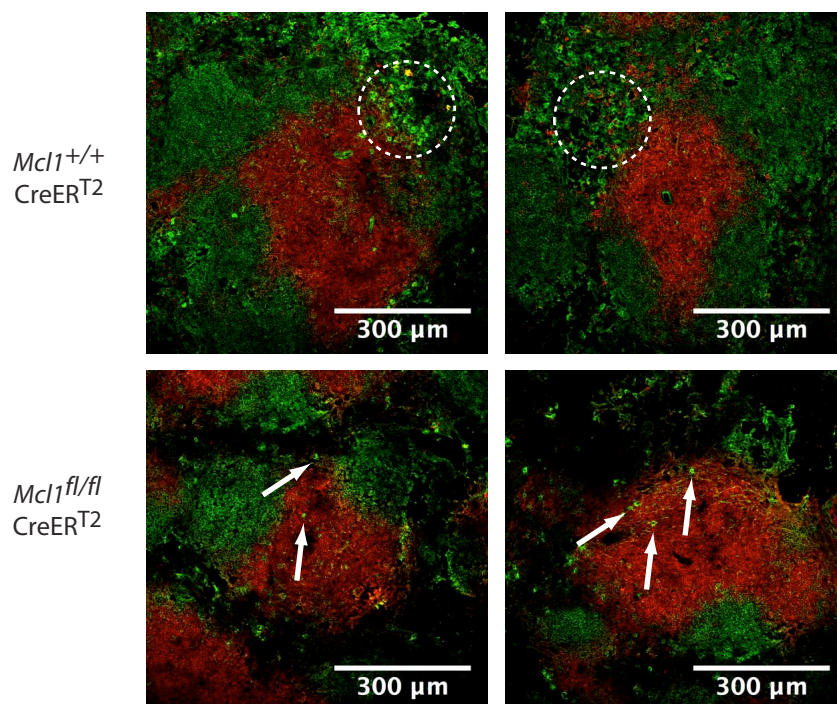

**Fig. S14.** Induced deletion of *Mcl1* leads to reduction in IgM<sup>+</sup> plasma blasts. Irradiated C57BL/6-Ly5.1 mice were reconstituted with 80% B cell deficient ( $\mu$ MT) bone marrow plus 20% bone marrow from *Mcl1*<sup>+/+</sup>CreER<sup>T2</sup>, *Mcl1*<sup>fl/+</sup>CreER<sup>T2</sup>, or *Mcl1*<sup>fl/fl</sup>CreER<sup>T2</sup>. In the resultant chimeras, all B cells contained CreER<sup>T2</sup>, expressed from the *Rosa26* locus, and were either resistant (*Mcl1*<sup>+/+</sup>) or sensitive to *Mcl1* deletion on one (*Mcl1*<sup>fl/+</sup>) or both (*Mcl1*<sup>fl/fl</sup>) alleles. Seven days after intraperitoneal immunization with NP-KLH in alum, mice were treated on two successive days with Tamoxifen to induce Cre activity. Frozen sections of spleens from the indicated strains were stained with anti-IgM (green) and anti-CD3 (red). IgM plasma blasts are indicated by dotted circles and arrows. Original magnification x 20 with scale indicated.
